# Supplementary material for: Anti-Trypanosoma cruzi Potential of Vestitol Isolated from Lyophilized Red Propolis
Source: MDPI journal article supplement (doi:10.3390/molecules28237812), 2023-11-28
Supplement: s1 [file s1]

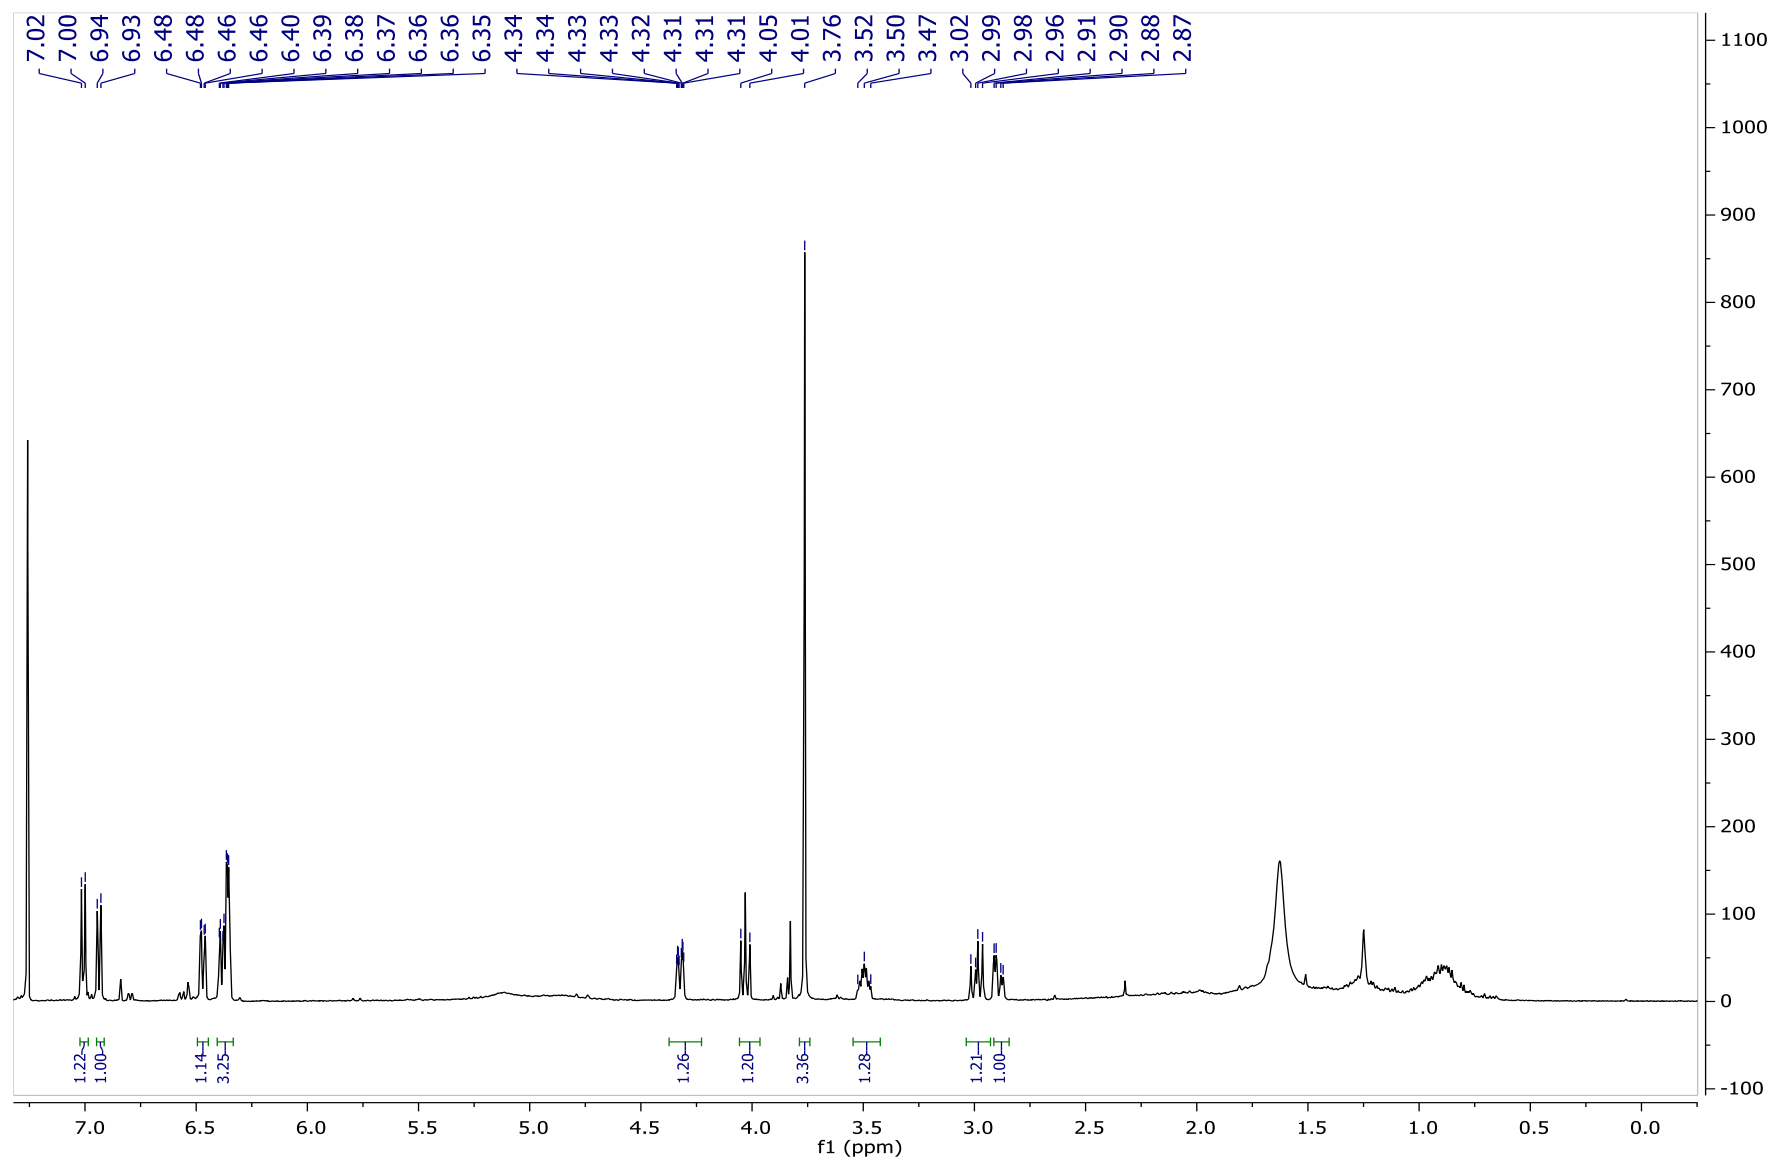

**Figure S1:**  $^1\text{H}$  RMN (500 MHz) spectrum of the vestitol in  $\text{CDCl}_3$

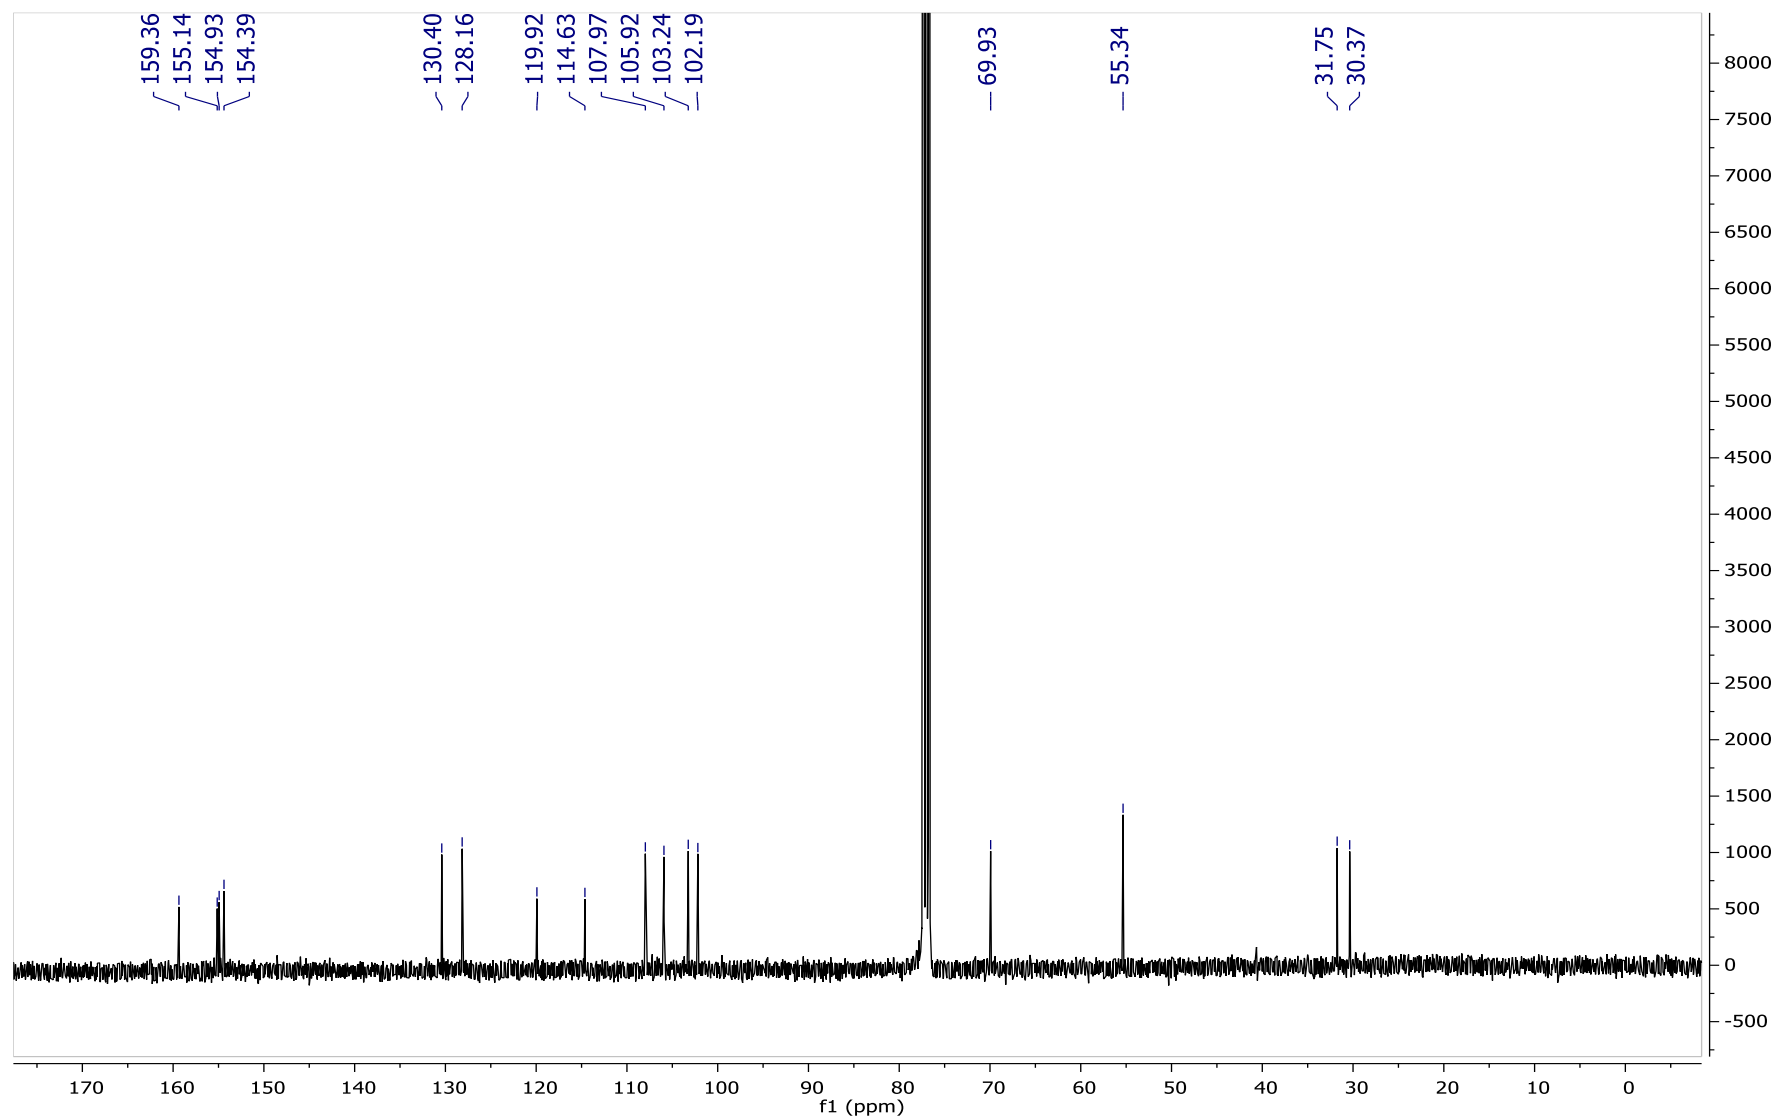

**Figure S2:** <sup>13</sup>C RMN (125 MHz) spectrum of the vestitol in CDCl<sub>3</sub>

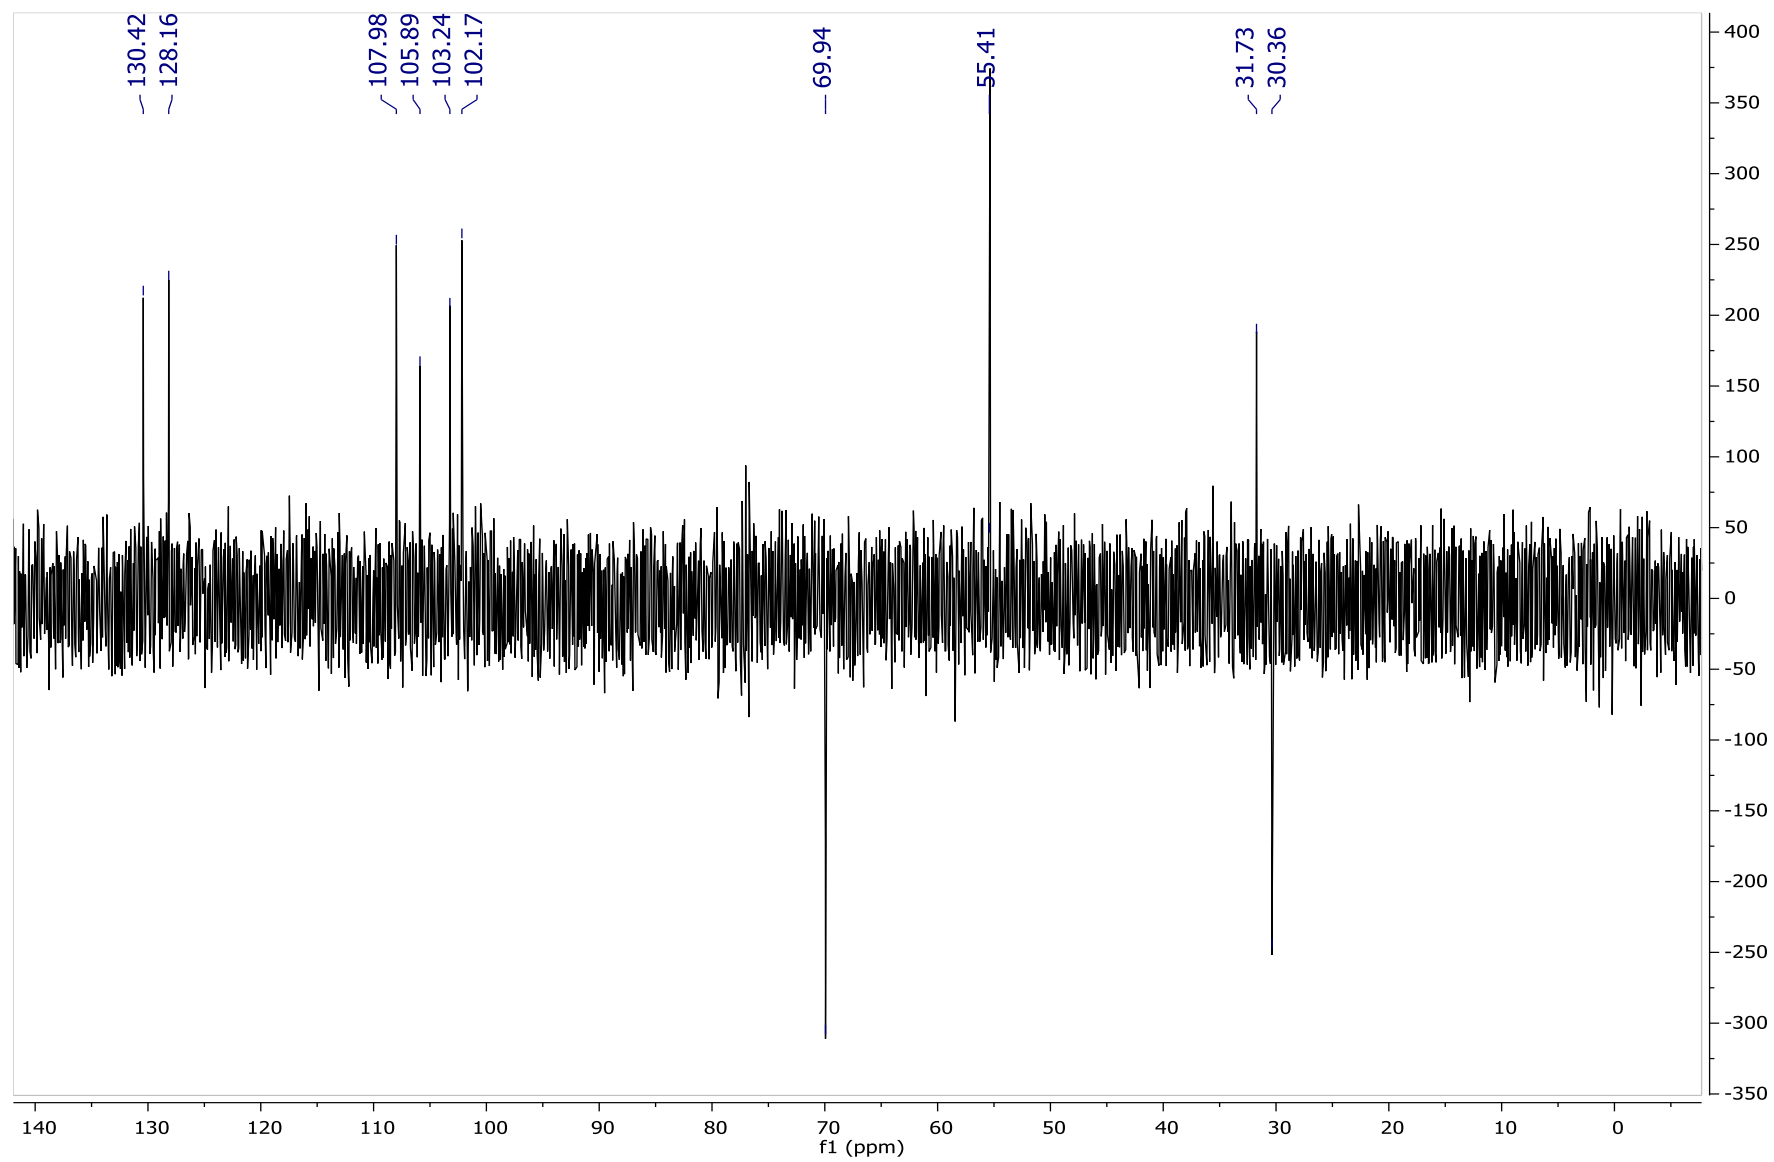

**Figure S3:**  $^{13}\text{C}$  RMN, DEPT 135° (125 MHz) spectrum of the vestitol in  $\text{CDCl}_3$

Pv\_c2\_3B pos mais TFA 100\_700 #1 RT: 0.02 AV: 1 NL: 6.61E6  
T: FTMS + p ESI Full ms [100.0000-700.0000]

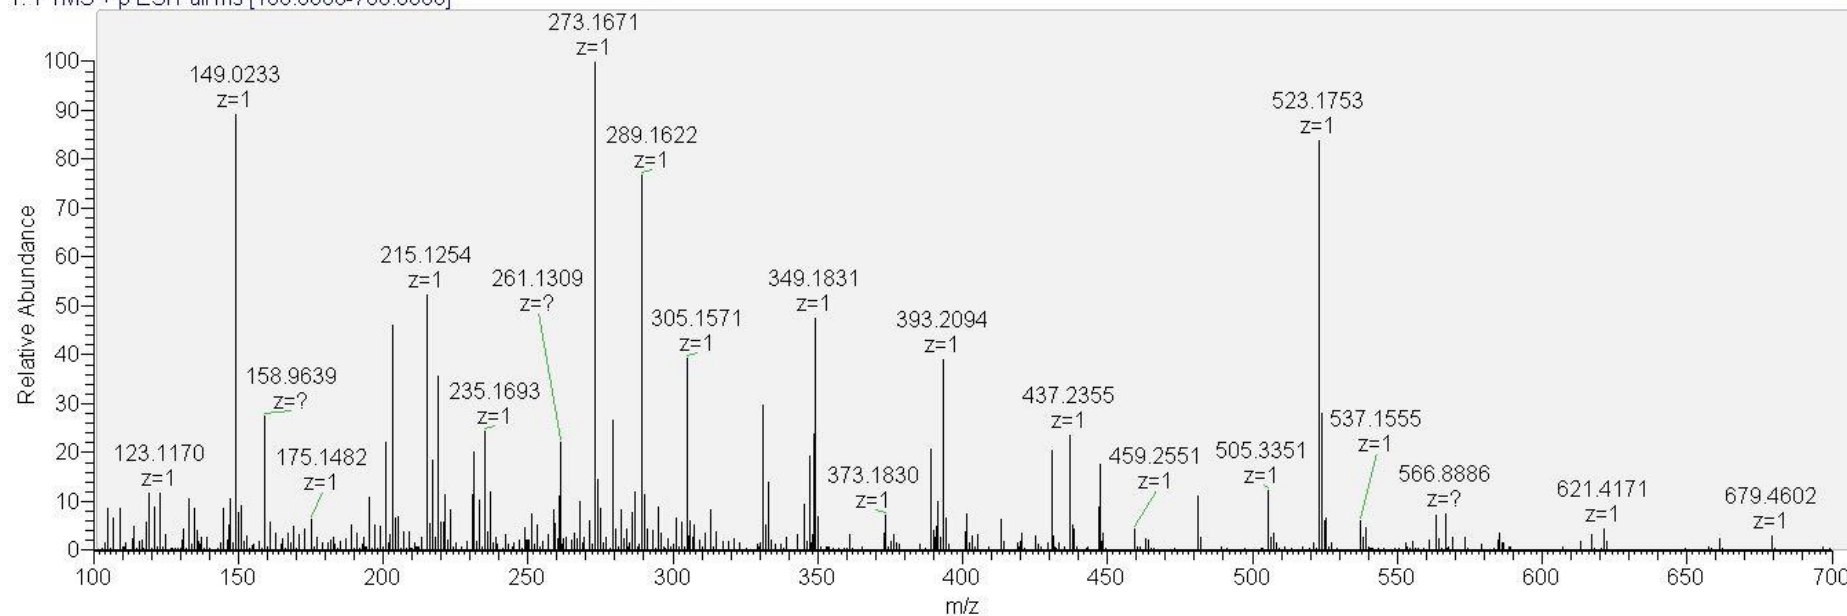

**Figure S4:** High resolution mass spectrum of the vestitol in the positive ion mode

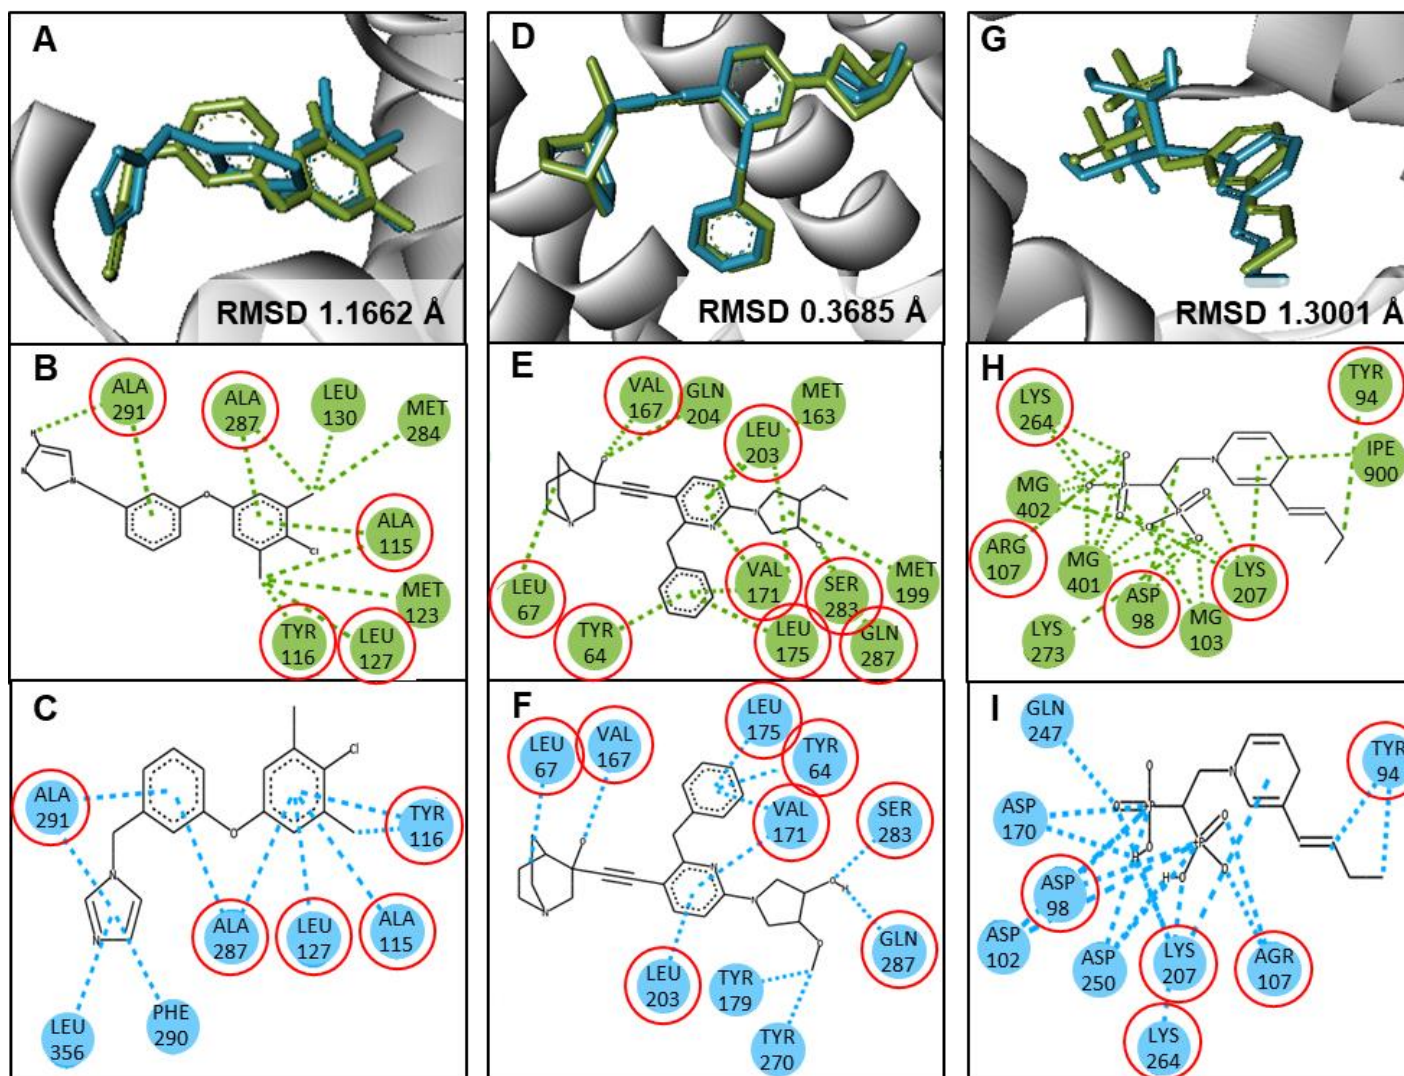

**Figure S5:** Superimposition of re-docked and 2D molecular interaction analysis for CYP51 (**A**, **B** and **C**), squalene synthase (**D**, **E** and **F**) and farnesyl synthase (**G**, **H** and **I**). Co-crystallized ligand (green) and the re-docked ligand (blue). Red cycle: similar residues comparing co-crystallized ligand and the re-docked ligand.
